# Supplementary figures and images for: Aminoglycoside tolerance in Vibrio cholerae engages translational reprogramming associated with queuosine tRNA modification
Source: eLife journal article supplement (doi:10.7554/elife.96317), 2024-06-05

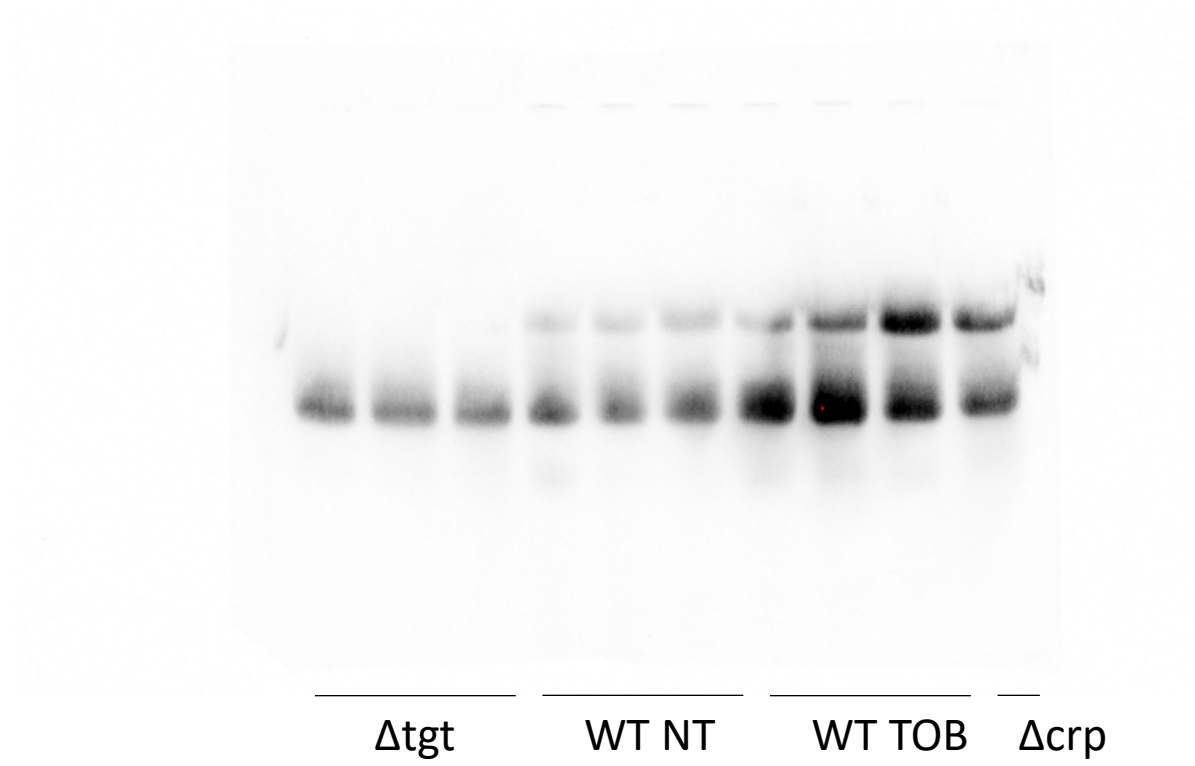

Supplement: fig6-data2 [file elife-96317-fig6-data2-v1.zip]
